# Supplementary material
Source: publisher site journal article supplement (https://www.dovepress.com/article/402456)
Supplement: Supplementary file 1 [file get_supplementary_file.php]

**Supplementary Materials 1: Search Strategy**

**Ovid MEDLINE(R) ALL 1946 to April 12, 2023**

Date searched: April 13, 2023

Results= 864

1. Exp Dissociative disorders/
2. Depersonalization/
3. (Dissociative or dissociation or Depersonali* or dereali* or fugue*).mp. and (Dissociative or dissociation or Depersonali* or dereali* or BPD or borderline personality or multiple personality or PTSD or trauma* or posttrauma* or fugue*).ti,kf.
4. 1 or 2 or 3
5. exp Psychotherapy/
6. psychotherap*.mp.
7. exp Mindfulness/
8. mindful*.mp.
9. "serotonin and noradrenaline reuptake inhibitors"/ or selective serotonin reuptake inhibitors/
10. (“serotonin and noradrenaline reuptake inhibitor*” or “serotonin noradrenaline reuptake inhibitor*” or serotonin reuptake inhibitor* or SSRI* or SNRI* or psychotropic* or anti anxiety* or antianxiety* or antipsychotic* or anti psychotic* or antidepressant* or anti depressant*).mp.
11. anti-anxiety agents/ or antipsychotic agents/
12. exp Psychotropic Drugs/
13. 5 or 6 or 7 or 8 or 9 or 10 or 11 or 12
14. (intervention* or therap* or treatment*).mp.
15. Drug Therapy/
16. pharmacotherap*.mp.
17. 14 or 15 or 16
18. (psyc* or mental health or mental disorder* or borderline personality disorder or BPD or trauma* or PTSD or PTSI or multiple personality disorder or Depersonali* or dereali* or postrauma* or depressi* or obsessive compulsive disorder* or OCD or bipolar or anxiety or mood* or fugue*).mp.
19. 4 and 13
20. 4 and 17 and 18
21. 19 or 20
22. limit 21 to animals
23. limit 22 to humans
24. 21 not (22 not 23)
25. 24 not ((mouse or mice or rat or rats or animal model or pig or pigs or porcine) not human*).ti.
26. exp Clinical trial/ or (randomi* or randomly or (random adj4 (allocat* or distribut* or assign*)) or placebo or trial or groups or subgroups or (phase adj1 ("3" or "2" or "1" or III or II or I))).tw. or dt.fs.
27. 25 and 26
28. (ketamine or esketamine or arketamine).ti.
29. 27 not 28

**Embase 1974 to 2023 April 12**

Date searched: April 13, 2023

Results: 1379

1. Exp Dissociative disorders/
2. Exp Depersonalization/
3. (Dissociative or dissociation or Depersonali* or dereali* or fugue*).mp. and (Dissociative or dissociation or Depersonali* or dereali* or BPD or borderline personality or multiple personality or PTSD or trauma* or posttrauma* or fugue*).ti,kf.
4. 1 or 2 or 3
5. exp Psychotherapy/
6. psychotherap*.mp.
7. exp Mindfulness/
8. mindful*.mp.
9. Exp serotonin noradrenaline reuptake inhibitor/
10. Exp serotonin reuptake inhibitor/
11. (“serotonin and noradrenaline reuptake inhibitor*” or “serotonin noradrenaline reuptake inhibitor*” or selective serotonin reuptake inhibitor* or SSRI* or SNRI* or psychotropic* or anti anxiety* or antianxiety* or antipsychotic* or anti psychotic* or antidepressant* or anti depressant*).mp.
12. exp anxiolytic agent/
13. exp neuroleptic agent/
14. exp psychotropic agent/
15. 5 or 6 or 7 or 8 or 9 or 10 or 11 or 12 or 13 or 14
16. (intervention* or therap* or treatment*).mp.
17. exp drug therapy/
18. pharmacotherap*.mp.
19. 16 or 17 or 18
20. (psyc* or mental health or mental disorder* or borderline personality disorder or BPD or trauma* or PTSD or PTSI or multiple personality disorder or Depersonali* or dereali* or postrauma* or depressi* or obsessive compulsive disorder* or OCD or bipolar or anxiety or mood* or fugue*).mp.
21. 4 and 15
22. 4 and 19 and 20
23. 21 or 22
24. limit 23 to animal studies
25. limit 24 to human
26. 23 not (24 not 25)
27. 26 not ((mouse or mice or rat or rats or animal model or pig or pigs or porcine) not human*).ti.
28. exp Clinical trial/ or (randomi* or randomly or (random adj4 (allocat* or distribut* or assign*)) or placebo or trial or groups or subgroups or (phase adj1 ("3" or "2" or "1" or III or II or I))).tw.
29. 27 and 28
30. (ketamine or esketamine or arketamine).ti.
31. 29 not 30

**APA PsycInfo 1806 to April Week 2 2023 (OVID interface)**

Date searched: April 13, 2023

Results: 773

1. exp Dissociative disorders/
2. exp depersonalization/
3. (Dissociative or dissociation or Depersonali* or dereali* or fugue*).mp. and (Dissociative or dissociation or Depersonali* or dereali* or BPD or borderline personality or multiple personality or PTSD or trauma* or posttrauma* or fugue*).ti,id.
4. 1 or 2 or 3
5. exp psychotherapy/
6. psychotherap*.mp.
7. exp mindfulness/
8. mindful*.mp.
9. exp serotonin reuptake inhibitors/
10. exp serotonin norepinephrine reuptake inhibitors/
11. ((serotonin and noradrenaline reuptake inhibitor*) or “serotonin and noradrenaline reuptake inhibitor*” or serotonin reuptake inhibitor* or SSRI* or SNRI* or psychotropic* or anti anxiety* or antianxiety* or antipsychotic* or anti psychotic* or antidepressant* or anti depressant*).mp.
12. exp anxiolytic drugs/
13. exp neuroleptic drugs/
14. exp antidepressant drugs/
15. 5 or 6 or 7 or 8 or 9 or 10 or 11 or 12 or 13 or 14
16. (intervention* or therap* or treatment*).mp.
17. exp drug therapy/
18. pharmacotherap*.mp.
19. 16 or 17 or 18
20. (psyc* or mental health or mental disorder* or borderline personality disorder or BPD or trauma* or PTSD or PTSI or multiple personality disorder or Depersonali* or dereali* or postrauma* or depressi* or obsessive compulsive disorder* or OCD or bipolar or anxiety or mood* or fugue*).mp.
21. 4 and 15
22. 4 and 19 and 20
23. 21 or 22
24. limit 23 to animal
25. limit 24 to human
26. 23 not (24 not 25)
27. exp Clinical trial/ or (randomi* or randomly or (random adj4 (allocat* or distribut* or assign*)) or placebo or trial or groups or subgroups or (phase adj1 ("3" or "2" or "1" or III or II or I))).ti,ab,hw.
28. 26 and 27
29. (ketamine or esketamine or arketamine).ti.
30. 28 not 29

**CINAHL Plus with Full Text (EBSCOhost interface)**

Date searched: April 13, 2023

Results: 326

Deselect: Apply equivalent subjects

S1 (MH "Dissociative Disorders+") OR (MH "Depersonalization") or ((Dissociative or dissociation or Depersonali* or dereali* or fugue*) and TI(Dissociative or dissociation or Depersonali* or dereali* or BPD or “borderline personality” or “multiple personality” or PTSD or trauma* or posttrauma* or fugue*))

S2 (MH “psychotherapy”) OR (MH “mindfulness”) OR (MH “antipsychotic agents”) or (psychotherap* or mindful* or “serotonin and noradrenaline reuptake inhibitor*” or “serotonin noradrenaline reuptake inhibitor*” or “serotonin reuptake inhibitor*” or SSRI* or SNRI* or psychotropic* or anti anxiety* or antianxiety* or antipsychotic* or anti psychotic* or antidepressant* or anti depressant*)

S3 (MH “Drug Therapy”) or (intervention* or therap* or treatment* or pharmacotherap*)

S4 (psyc* or “mental health” or “mental disorder*” or “borderline personality disorder” or BPD or trauma* or PTSD or PTSI or “multiple personality disorder” or Depersonali* or dereali* or postrauma* or depressi* or “obsessive compulsive disorder*” or OCD or bipolar or anxiety or mood* or fugue*)

S5 S1 AND S2

S6 S1 AND S3 AND S4

S7 S5 OR S6

S8 (MH “randomized controlled trials”) or (clinical trial) or (randomi* or randomly or (random N4 (allocat* or distribut* or assign*)) or placebo or trial or groups or subgroups or (phase N1 ("3" or "2" or "1" or III or II or I)))

S9 S7 AND S8

S10 (TI (ketamine or esketamine or arketamine))

S11 S9 NOT S10

**SCOPUS (Advanced search)**

Date searched: April 13, 2023

Results: 1531

( ( ( TITLE-ABS-KEY ( dissociative OR dissociation OR depersonali* OR dereali* OR fugue* ) AND ( TITLE ( dissociative OR dissociation OR depersonali* OR dereali* OR bpd OR "borderline personality" OR "multiple personality" OR ptsd OR trauma* OR posttrauma* OR fugue* ) OR KEY ( dissociative OR dissociation OR depersonali* OR dereali* OR bpd OR "borderline personality" OR "multiple personality" OR ptsd OR trauma* OR posttrauma* OR fugue* ) ) ) AND ( TITLE-ABS-KEY ( psychotherap* OR mindful* OR "serotonin and noradrenaline reuptake inhibitor*" OR "serotonin noradrenaline reuptake inhibitor*" OR "serotonin reuptake inhibitor*" OR ssri* OR snri* OR psychotropic* OR anti-anxiety* OR antianxiety* OR antipsychotic* OR anti-psychotic* OR antidepressant* OR anti-depressant* ) OR TITLE-ABS-KEY ( ( intervention* OR therap* OR treatment* OR pharmacotherap* ) AND ( psyc* OR "mental health" OR "mental disorder*" OR "borderline personality disorder" OR bpd OR trauma* OR ptsd OR ptsi OR "multiple personality disorder" OR depersonali* OR dereali* OR postrauma* OR depressi* OR "obsessive compulsive disorder*" OR ocd OR bipolar OR anxiety OR mood* OR fugue* ) ) ) AND TITLE-ABS-KEY ( "clinical trial" OR randomi* OR randomly OR ( random W/4 ( allocat* OR distribut* OR assign* ) ) OR placebo OR {trial} OR {groups} OR {subgroups} OR ( phase W/1 ( "3" OR "2" OR "1" OR iii OR ii OR i ) ) ) ) AND NOT ( TITLE ( ( mouse OR mice OR rat OR rats OR "animal model" OR pig OR pigs OR porcine OR animal OR animals OR veterinary ) AND NOT human* ) OR KEY ( ( mouse OR mice OR rat OR rats OR "animal model" OR pig OR pigs OR porcine ) AND NOT human* ) ) ) AND NOT TITLE ( ketamine OR esketamine OR arketamine )
